# Supplementary material
Source: MDPI journal article supplement (https://www.mdpi.com/2073-4441/13/3/369)
Supplement: s1 [file s1]

# A Highly Packed Biofilm Reactor with Cycle Cleaning for the Efficient Treatment of Rural Wastewater

## Supplementary materials

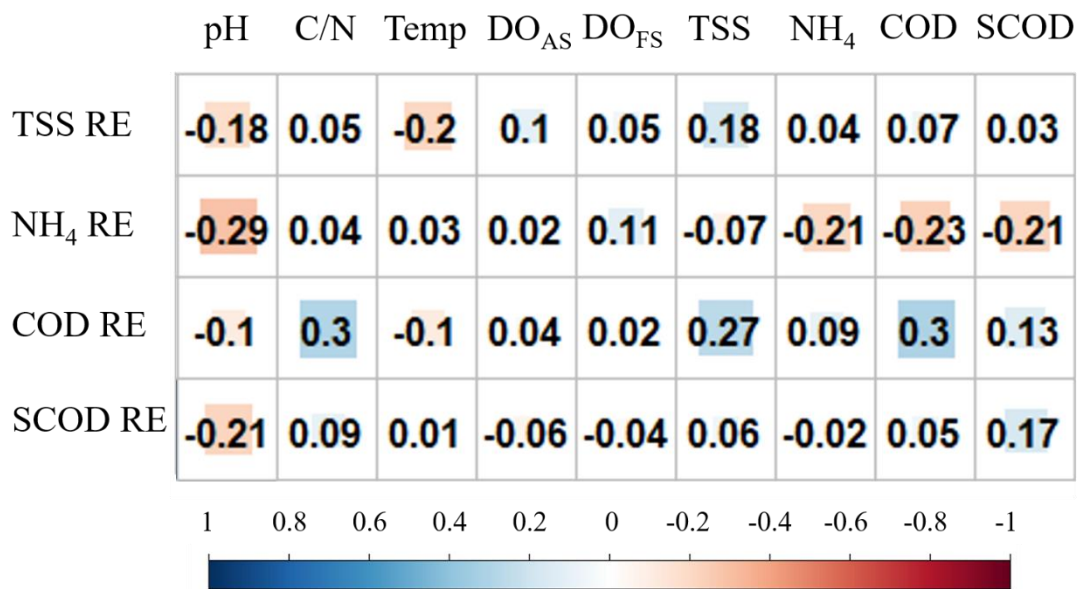

**Figure S1.** The effect of different influencing factors in influents.

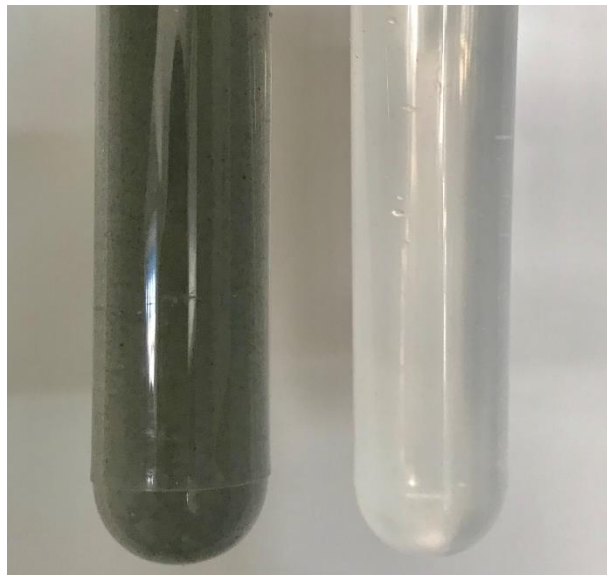

**Figure S2.** Digital pictures of the influent (left) and the effluent (right).
